# Supplementary material for: Gradual, temperature-induced change of secondary sexual characteristics in Trichogramma pretiosum infected with parthenogenesis-inducing Wolbachia
Source: PeerJ. 2019 Aug 23;7:e7567. doi: 10.7717/peerj.7567 (PMC6709661; doi:10.7717/peerj.7567)
Supplement: Supplemental Information 1 — The probability of intersex individuals produced by T. preW+and T. preW under different temperatures. [file peerj-07-7567-s001.xlsx]

## Sheet: Sheet1
T. preW+
generation	temperature	intersex	ratio	total	pF	pM	quasiintersex	cri.intersex
f1	27	2	0.17	1176	2	0	1	1
f1	29	4	0.51	784	4	0	1	3
f1	31	12	1.43	839	10	0	4	4
f1	33	7	1.41	496	6	1	3	3
f2	27	20	0.07	28571	19	1	14	5
f2	29	41	0.26	15769	41	0	14	27
f2	31	72	0.25	28800	71	1	22	49
f2	33	77	1.06	7264	74	3	16	58
				83699
T. preW
generation	temperature	intersex	ratio	total
f1	27	0	0	1022
f1	29	0	0	601
f1	31	0	0	923
f1	33	0	0	652
f2	27	0	0	25465
f2	29	0	0	16547
f2	31	0	0	28457
f2	33	0	0	6999
