# Supplementary material for: Gradual, temperature-induced change of secondary sexual characteristics in Trichogramma pretiosum infected with parthenogenesis-inducing Wolbachia
Source: PeerJ. 2019 Aug 23;7:e7567. doi: 10.7717/peerj.7567 (PMC6709661; doi:10.7717/peerj.7567)
Supplement: Supplemental Information 2 [file peerj-07-7567-s002.xlsx]

## Sheet: Sheet3
temperature	generation	T. preW+ level
27	1	4(D)
27	1	8(H)
29	1	4(D)
29	1	6(F)
29	1	8(H)
29	1	8(H)
31	1	2(B)
31	1	3(C)
31	1	4(D)
31	1	4(D）
31	1	4(D）
31	1	5(E)
31	1	8(H)
31	1	8(H)
31	1	8(H)
31	1	8(H)
31	1	9(I)
31	1	11(K)
33	1	4(D）
33	1	4(D）
33	1	4(D）
33	1	8(H)
33	1	8(H)
33	1	8(H)
33	1	9(I)
27	2	2(B)
27	2	4(D）
27	2	4(D）
27	2	4(D）
27	2	4(D）
27	2	4(D）
27	2	4(D）
27	2	4(D）
27	2	4(D）
27	2	4(D）
27	2	4(D）
27	2	4(D）
27	2	4(D）
27	2	4(D）
27	2	8(H)
27	2	8(H)
27	2	8(H)
27	2	8(H)
27	2	8(H)
27	2	10(J)
29	2	1(A)
29	2	3(C)
29	2	3(C)
29	2	4(D）
29	2	4(D）
29	2	4(D）
29	2	4(D）
29	2	4(D）
29	2	4(D）
29	2	4(D）
29	2	4(D）
29	2	4(D）
29	2	4(D）
29	2	4(D）
29	2	6(F)
29	2	8(H)
29	2	8(H)
29	2	8(H)
29	2	8(H)
29	2	8(H)
29	2	8(H)
29	2	8(H)
29	2	8(H)
29	2	8(H)
29	2	8(H)
29	2	8(H)
29	2	8(H)
29	2	8(H)
29	2	8(H)
29	2	8(H)
29	2	8(H)
29	2	8(H)
29	2	8(H)
29	2	8(H)
29	2	8(H)
29	2	8(H)
29	2	8(H)
29	2	8(H)
29	2	8(H)
29	2	8(H)
29	2	8(H)
31	2	1(A)
31	2	1(A)
31	2	4(D）
31	2	4(D）
31	2	4(D）
31	2	4(D）
31	2	4(D）
31	2	4(D）
31	2	4(D）
31	2	4(D）
31	2	4(D）
31	2	4(D）
31	2	4(D）
31	2	4(D）
31	2	4(D）
31	2	4(D）
31	2	4(D）
31	2	4(D）
31	2	4(D）
31	2	4(D）
31	2	4(D）
31	2	4(D）
31	2	6(F)
31	2	6(F)
31	2	6(F)
31	2	6(F)
31	2	6(F)
31	2	6(F)
31	2	8(H)
31	2	8(H)
31	2	8(H)
31	2	8(H)
31	2	8(H)
31	2	8(H)
31	2	8(H)
31	2	8(H)
31	2	8(H)
31	2	8(H)
31	2	8(H)
31	2	8(H)
31	2	8(H)
31	2	8(H)
31	2	8(H)
31	2	8(H)
31	2	8(H)
31	2	8(H)
31	2	8(H)
31	2	8(H)
31	2	8(H)
31	2	8(H)
31	2	8(H)
31	2	8(H)
31	2	8(H)
31	2	8(H)
31	2	8(H)
31	2	8(H)
31	2	8(H)
31	2	8(H)
31	2	8(H)
31	2	8(H)
31	2	8(H)
31	2	8(H)
31	2	8(H)
31	2	8(H)
31	2	8(H)
31	2	8(H)
31	2	8(H)
31	2	8(H)
31	2	8(H)
31	2	8(H)
31	2	8(H)
33	2	2(B)
33	2	4(D）
33	2	4(D）
33	2	4(D）
33	2	4(D）
33	2	4(D）
33	2	4(D）
33	2	4(D）
33	2	4(D）
33	2	4(D）
33	2	4(D）
33	2	4(D）
33	2	4(D）
33	2	4(D）
33	2	5(E)
33	2	5(E)
33	2	6(F)
33	2	6(F)
33	2	7(G)
33	2	7(G)
33	2	8(H)
33	2	8(H)
33	2	8(H)
33	2	8(H)
33	2	8(H)
33	2	8(H)
33	2	8(H)
33	2	8(H)
33	2	8(H)
33	2	8(H)
33	2	8(H)
33	2	8(H)
33	2	8(H)
33	2	8(H)
33	2	8(H)
33	2	8(H)
33	2	8(H)
33	2	8(H)
33	2	8(H)
33	2	8(H)
33	2	8(H)
33	2	8(H)
33	2	8(H)
33	2	8(H)
33	2	8(H)
33	2	8(H)
33	2	8(H)
33	2	8(H)
33	2	8(H)
33	2	8(H)
33	2	8(H)
33	2	8(H)
33	2	8(H)
33	2	8(H)
33	2	8(H)
33	2	8(H)
33	2	8(H)
33	2	8(H)
33	2	8(H)
33	2	8(H)
33	2	8(H)
33	2	8(H)
33	2	8(H)
33	2	8(H)
33	2	8(H)
33	2	8(H)
33	2	8(H)
33	2	8(H)
33	2	8(H)
33	2	8(H)
33	2	8(H)
33	2	8(H)
33	2	8(H)
33	2	8(H)
33	2	10(J)
33	2	10(J)
33	2	11(K)
